# Supplementary material for: Association between fluoride intake from drinking water and severity of dental fluorosis in Northern and Western Mexico: systematic review and meta-analysis
Source: Springer Nature journal article supplement (doi:10.1186/s12903-024-04472-7), 2024-06-19
Supplement: MOESM1 [file 12903_2024_4472_MOESM1_ESM.pdf]

**Appendix 1.** Evaluación de la calidad metodológica mediante la lista de comprobación del JBI.

| Artículos                                       | Respuesta              |   |   |   |   |   |   |   |         |          |
|-------------------------------------------------|------------------------|---|---|---|---|---|---|---|---------|----------|
|                                                 | 1                      | 2 | 3 | 4 | 5 | 6 | 7 | 8 | Puntaje | Calidad  |
|                                                 | Estudios transversales |   |   |   |   |   |   |   |         |          |
| Jarquín- Yañez et al. (2015) <sup>16</sup>      | Y                      | Y | Y | Y | U | U | Y | Y | 6       | Moderada |
| Escobar-García et al. (2015) <sup>17</sup>      | Y                      | Y | Y | Y | N | N | Y | Y | 6       | Moderada |
| Aguilar-Díaz et al. (2016) <sup>18</sup>        | Y                      | U | Y | Y | N | N | Y | Y | 5       | Moderada |
| Molina Frechero et al. (2017) <sup>5</sup>      | Y                      | Y | Y | Y | Y | Y | N | Y | 7       | Alta     |
| Jarquín-Yañez et al. (2018) <sup>19</sup>       | Y                      | Y | Y | Y | N | N | Y | Y | 6       | Moderada |
| Contreras-Espinoza et al. (2018) <sup>20</sup>  | N                      | Y | Y | Y | N | N | Y | N | 4       | Moderada |
| Tremillo- Maldonado et al. (2020) <sup>21</sup> | Y                      | N | Y | Y | N | N | Y | Y | 5       | Moderada |
| Duran-Merino et al. (2020) <sup>22</sup>        | Y                      | N | Y | Y | N | N | Y | Y | 5       | Moderada |
| Ontiveros et al. (2020) <sup>23</sup>           | Y                      | Y | Y | Y | Y | N | N | Y | 6       | Moderada |
| Farías et al. (2021) <sup>24</sup>              | Y                      | Y | Y | Y | N | N | Y | Y | 6       | Moderada |
| González-Dávila et al. (2021) <sup>25</sup>     | Y                      | Y | Y | Y | Y | Y | Y | Y | 8       | Alta     |

Y: yes; N: no; U: unclear.
